# Supplementary material
Source: Research Square preprint supplement (doi:10.21203/rs.3.rs-9869713/v1)
Supplement: Supplementary file 1 [file cd48ccc00663a26dd2bf1617.docx]

**Supplementary Information**

*Two Discourses of the “Special Relationship”: A Comparative Linguistic and Political Discourse Analysis of English-Language Royal and Populist Speech — King Charles III’s State Visit to the United States, 28 April 2026*

This Supplementary Information accompanies the article and is intended for publication with it. It provides the full statistical detail underlying the summarised Table 2 in the main text (Section S1), together with the coding and count documentation that allows every reported frequency to be reconstructed (Sections S2–S3) and the primary-source transcripts used (Section S4). It contains no information identifying the author.

# **S1. Full lexical statistics (Table S1)**

Table S1 reports the complete item-by-item statistics summarised as Table 2 in the main text: raw counts, normalised frequencies per 1,000 tokens, the log-likelihood keyness statistic (G²), the Benjamini–Hochberg FDR-adjusted significance band, and the Log Ratio effect size with its 95% confidence interval. Sub-corpus sizes are Charles (Speeches B + D) = 5,010 tokens and Trump (Speeches A + C) = 2,729 tokens.

*Table S1. Key lexical items by sub-corpus, with raw counts, normalised frequencies (per 1,000 tokens), keyness, FDR-adjusted significance, and Log Ratio (95% CI).*

| **Item / cluster** | **C raw** | **C/1k** | **T raw** | **T/1k** | **G²** | **q (BH)** | **Log Ratio [95% CI]** |
| --- | --- | --- | --- | --- | --- | --- | --- |
| alliance / allies / allied | 27 | 5.4 | 1 | 0.4 | 16.9 | <.001 | +3.88 [1.00, 6.76] |
| partnership / partners | 23 | 4.6 | 0 | 0.0 | 20.0 | <.001 | +4.65 [0.60, 8.69]† |
| NATO / AUKUS | 27 | 5.4 | 0 | 0.0 | 23.5 | <.001 | +4.88 [0.84, 8.91]† |
| Commonwealth | 7 | 1.4 | 0 | 0.0 | 6.1 | *.062 n.s.* | *+2.93 [−1.21, 7.07]†* |
| constitution / constit’l / law | 18 | 3.6 | 2 | 0.7 | 6.8 | <.05 | +2.29 [0.19, 4.40] |
| checks and balances | 5 | 1.0 | 0 | 0.0 | 4.3 | *.169 n.s.* | *+2.45 [−1.75, 6.64]†* |
| multilateral / institutions | 8 | 1.6 | 0 | 0.0 | 7.0 | *.062 n.s.* | *+3.12 [−1.00, 7.25]†* |
| blood / veins / hearts beat | 0 | 0.0 | 15 | 5.5 | 31.3 | <.001 | −5.78 [−9.85, −1.72]† |
| heritage / inheritance / ancestors | 3 | 0.6 | 23 | 8.4 | 32.0 | <.001 | −3.82 [−5.55, −2.08] |
| mother country / Anglo-Saxon | 0 | 0.0 | 7 | 2.6 | 14.6 | <.01 | −4.68 [−8.82, −0.54]† |
| greatest / great | 7 | 1.4 | 26 | 9.5 | 26.2 | <.001 | −2.77 [−3.97, −1.57] |
| tremendous / fantastic / unbreakable | 0 | 0.0 | 18 | 6.6 | 37.5 | <.001 | −6.05 [−10.10, −1.99]† |
| eternal / forever / priceless | 1 | 0.2 | 15 | 5.5 | 24.7 | <.001 | −4.78 [−7.70, −1.86] |

*Note. G² = log-likelihood (1 df); critical values 3.84 (p < .05), 6.63 (p < .01), 10.83 (p < .001), 15.13 (p < .0001). q (BH) = Benjamini–Hochberg FDR-adjusted significance band; “n.s.” = not significant after correction. Positive Log Ratio favours Charles, negative favours Trump; one unit = one doubling of the relative rate. † = a +0.5 smoothing constant was applied to a zero cell, so the Log Ratio and its interval are estimates. Fisher’s exact test agreed with G² on every item. A significance test is not a substitute for interpretive significance: in so small a corpus an item may carry interpretive weight without reaching significance, and a significant item may be driven by a single dense passage — hence the dispersion note and the exclusion of the three n.s. items from the argument in the main text.*

# **S2. Coding manual (summary)**

Tokenisation. A token is a whitespace-and-punctuation-delimited orthographic word; stage directions, audience-reaction markers, and bracketed editorial insertions are excluded. The same rule set was applied uniformly to all four as-delivered texts.

Lexical fields. Content words were assigned to semantic fields by hand; clusters group morphological variants and near-synonyms fixed before significance testing to avoid post-hoc selection.

Pronouns. First- and second-person pronominal tokens were annotated for form and, for first-person plural, for referential scope (inclusive Anglo-American; multilateral; British-only; American-ancestral; other/ambiguous).

Modality. Modal verbs and adjuncts were classified as epistemic or deontic; the central tested contrast is aggregate epistemic hedging versus categorical/absolute marking.

Speech acts. Each illocutionary unit was coded once into one of Searle’s (1969) five categories by two independent coders (overall κ = 0.79; Krippendorff’s α = 0.78). The veiled-directive binary judgement (κ = 0.71) used two formal criteria: declarative mood and independently judged high contextual illocutionary force; audience response was recorded separately as weak corroborating evidence only.

Metaphor. Metaphorically used words were identified using the Pragglejaz Group’s (2007) MIP protocol by two analysts, with disagreements resolved by discussion.

# **S3. Count documentation**

Sub-corpus sizes: Charles = Speech B (3,512 tokens) + Speech D (1,498) = 5,010; Trump = Speech A (1,486) + Speech C (1,243) = 2,729. Dispersion is recorded as presence in one or both of the relevant speaker’s two speeches; every FDR-significant item occurs in both speeches except mother country/Anglo-Saxon and the eternal/forever cluster (Speech A only).

Aggregate modality test: epistemic hedges Charles 25 (5.0/1,000) vs Trump 2 (0.7/1,000); categorical markers Charles 2 (0.4) vs Trump 14 (5.1); log-likelihood G² = 17.8, p < .001; Fisher p < .001.

Coded illocutionary units: Charles n = 271; Trump n = 122.

# **S4. Primary-source transcripts**

- Speech A — Trump, Welcoming remarks, State Arrival Ceremony, 28 April 2026 (The White House; cross-checked against Associated Press and CBS News).
- Speech B — King Charles III, Address to a Joint Meeting of Congress, 28 April 2026 (Royal.uk; Congressional Record, Vol. 172, No. 74; C-SPAN video).
- Speech C — Trump, Toast at the State Dinner, 28 April 2026 (Roll Call/Factba.se).
- Speech D — King Charles III, Toast at the State Dinner, 28 April 2026 (Royal.uk; full text also published by ABC News).

*Note. Stable URLs and access dates appear in the reference list of the main article. The annotated corpus files (tokenised texts, tags, annotations, codings, and per-item counts) constitute the data deposit referenced in the Data availability statement; the repository entry will not identify the author.*
